# Supplementary material for: Influence of Estrogen Treatment on ESR1+ and ESR1− Cells in ER+ Breast Cancer: Insights from Single-Cell Analysis of Patient-Derived Xenograft Models
Source: MDPI journal article supplement (doi:10.3390/cancers13246375), 2021-12-19
Supplement: s1 [file s1]

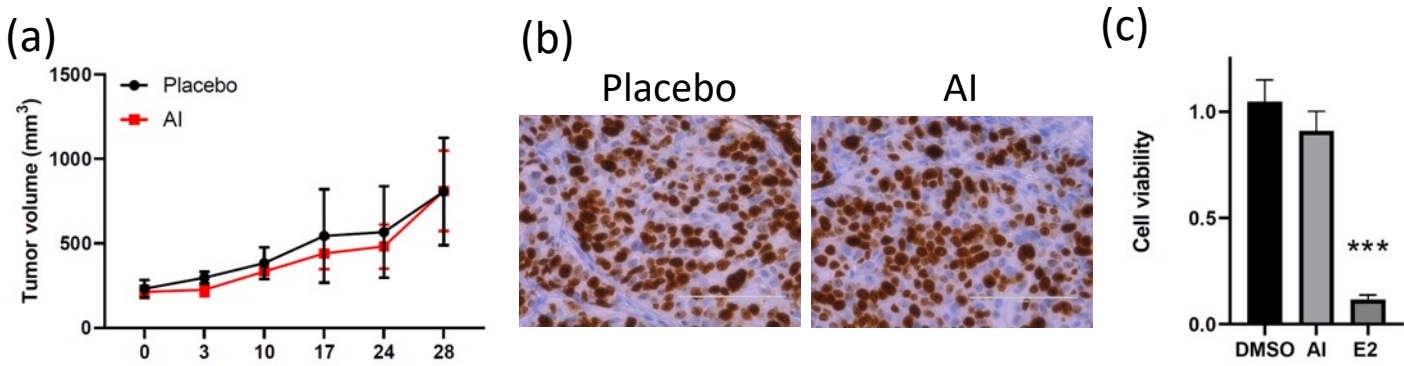

**Figure S1** Aromatase inhibitor (AI)/placebo treatments to GS3-PDX: **(a)** Tumor growth curve of GS3-PDX with AI (letrozole, 10 mg, daily s.c.) or placebo treatment for 28 days; **(b)** immunohistochemistry of Ki-67 expression in GS3 tumors treated with AI or placebo; **(c)** Cell viability of  $10^4$  organoids (isolated from GS3 tumor) treated with DMSO (Dimethyl sulfoxide), AI (letrozole, 200nM), or E2 (10nM) for 96 hours *in vitro* (\*\* $p < 0.0001$ ); Error bars represent SEM.

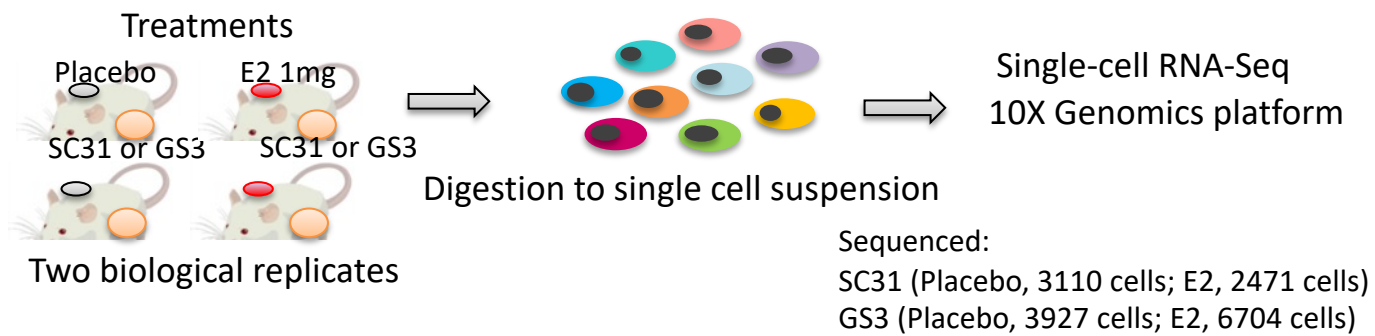

**Figure S2** Overview of scRNA-Seq approach using two PDX models.

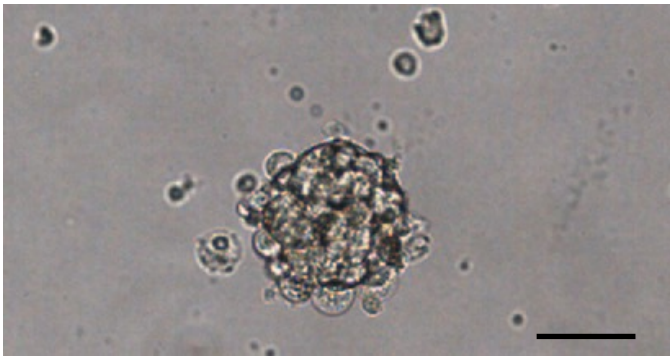

**Figure S3** Organoids established from GS3-PDX tumors. Organoids were established from single cells isolated from fresh GS3 tumor. This organoid is control sample (Dimethyl sulfoxide) incubated for 3 days. Scale bar represents 50  $\mu\text{m}$ .

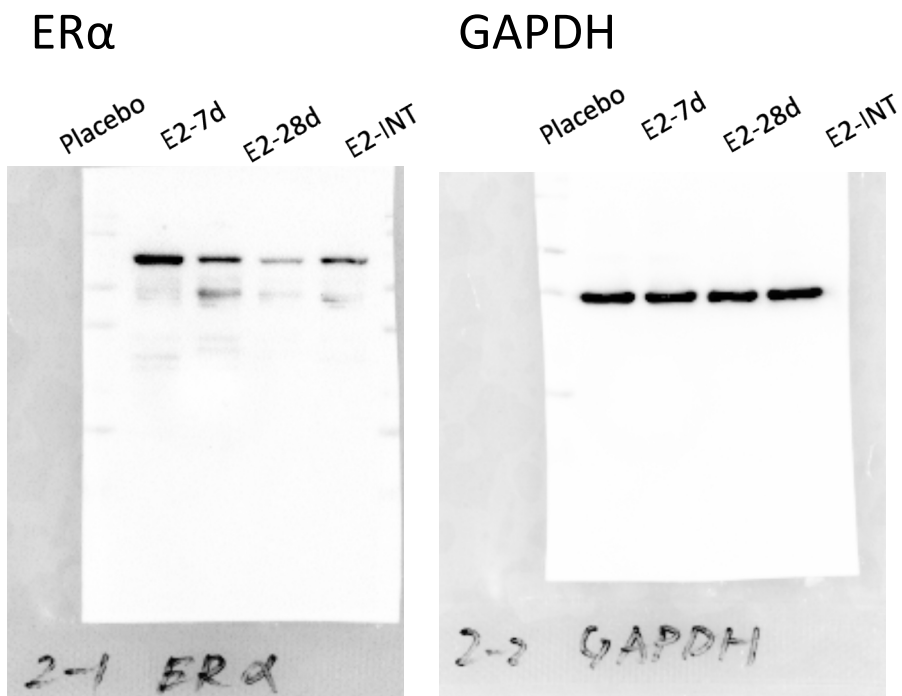

**Figure S4** Whole blots of ER $\alpha$  expression of GS3 tumors treated with placebo, 7-day E2, 28-day E2 and intermittent E2 by Western blotting.

**(a) Human-derived cells of SC31**

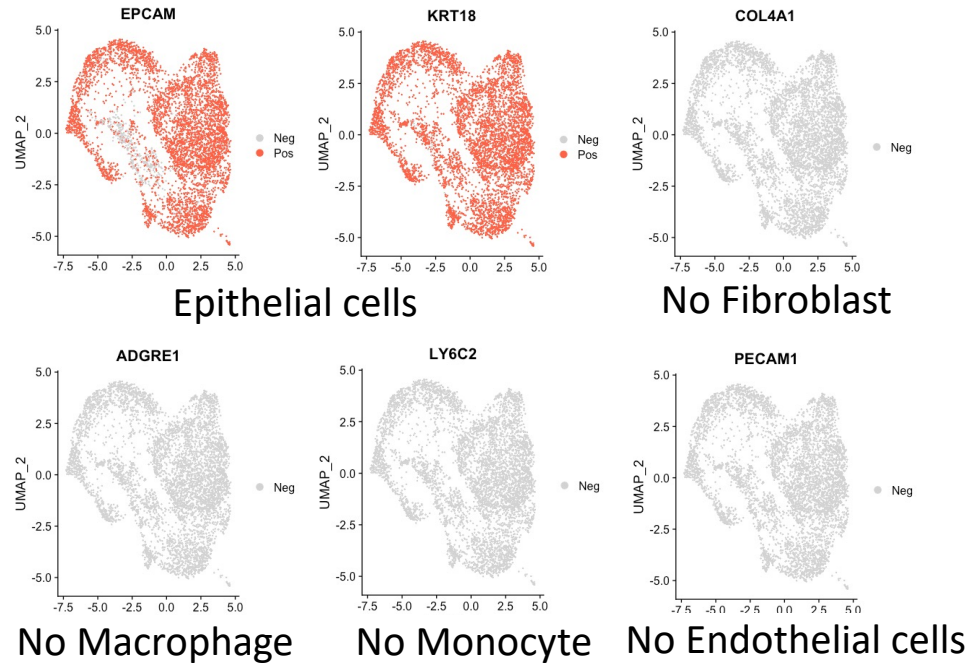

**(b) Mouse-derived cells of SC31**

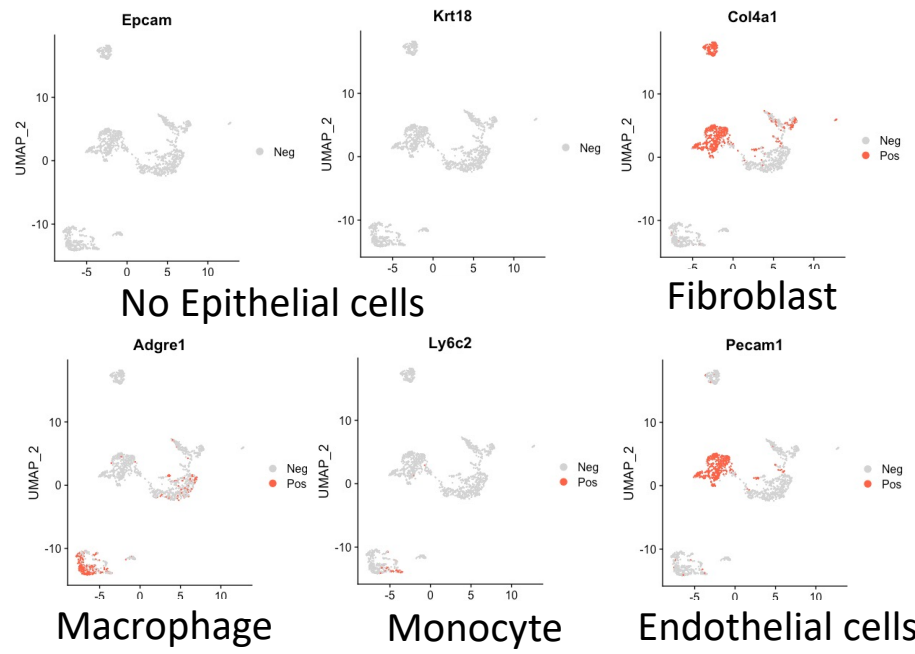

**Figure S5 (1/2)** Epithelial and stromal cell markers in human/mouse-derived cells in SC31 (a, b) and GS3 (c, d).

(c) Human-derived cells of GS3

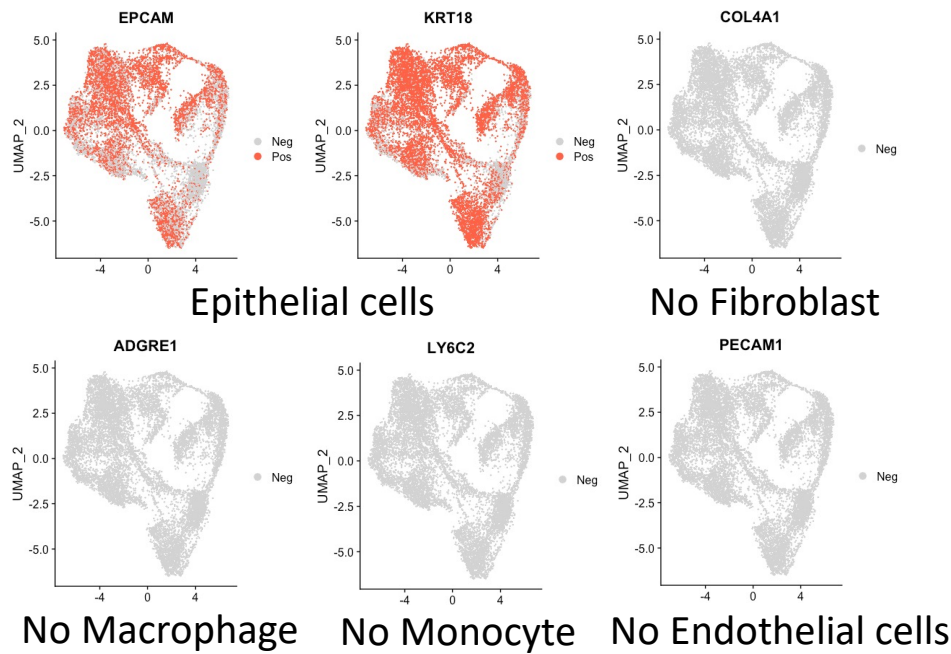

(d) Mouse-derived cells of GS3

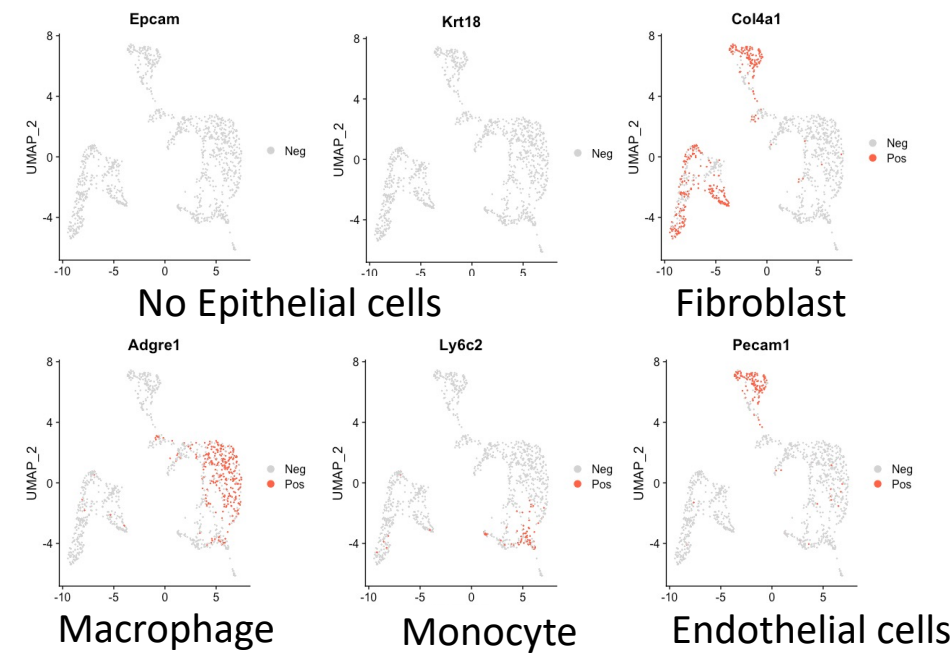

**Figure S5 (2/2)** Epithelial and stromal cell markers in human/mouse-derived cells in SC31 (a, b) and GS3 (c, d).

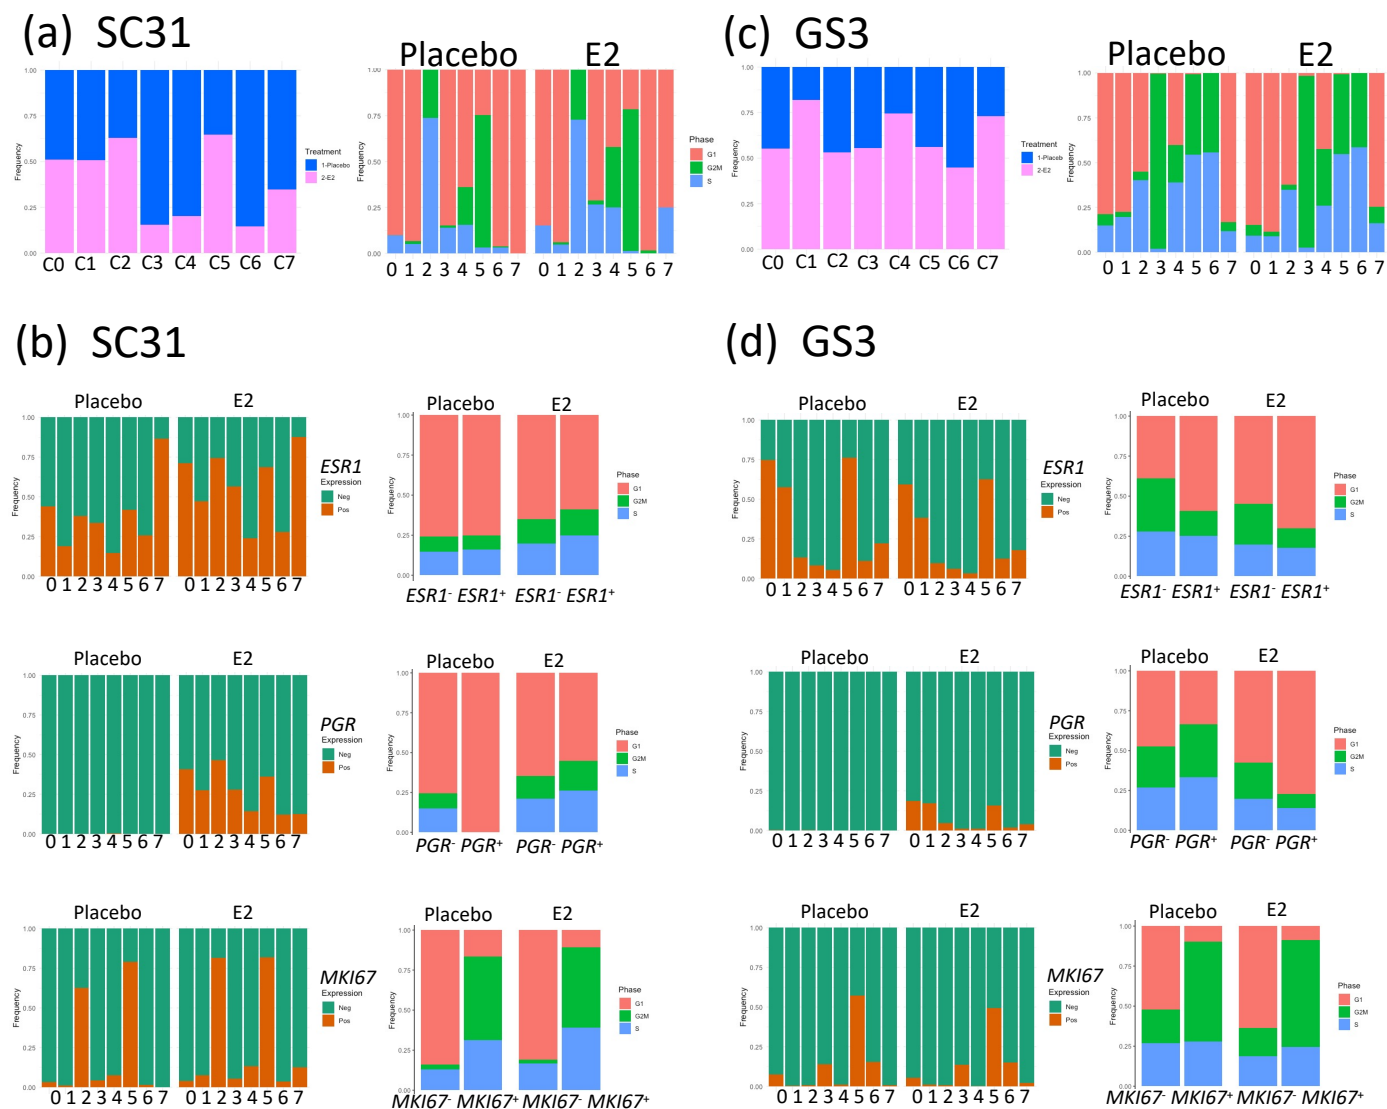

**Figure S6** Cell distribution of single-cell clusters by treatments and by cell cycle phases (separated by treatments) in (a) SC31 and (c) GS3; Cell distribution of single cell clusters and cell cycle phases by gene expression (separated by treatments) in (b) SC31 and (d) GS3.

## (a) SC31

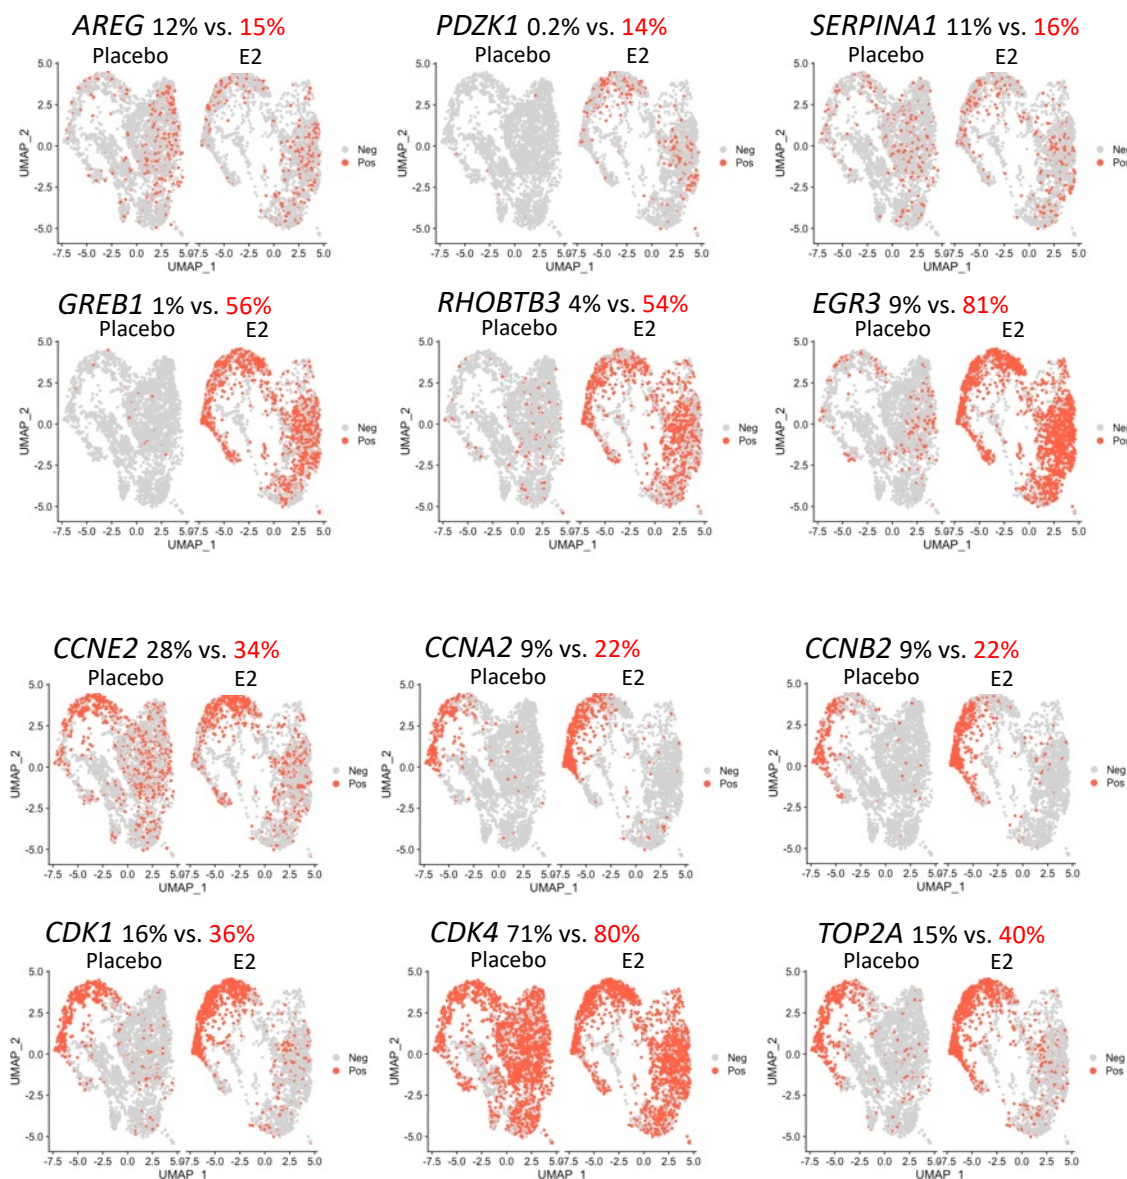

**Figure S7 (1/2)** Gene expression (estrogen-regulated genes and cell cycle proliferation genes) comparison of E2-treated cells versus placebo-treated cells in (a) SC31 and (b) GS3.



## (b) GS3

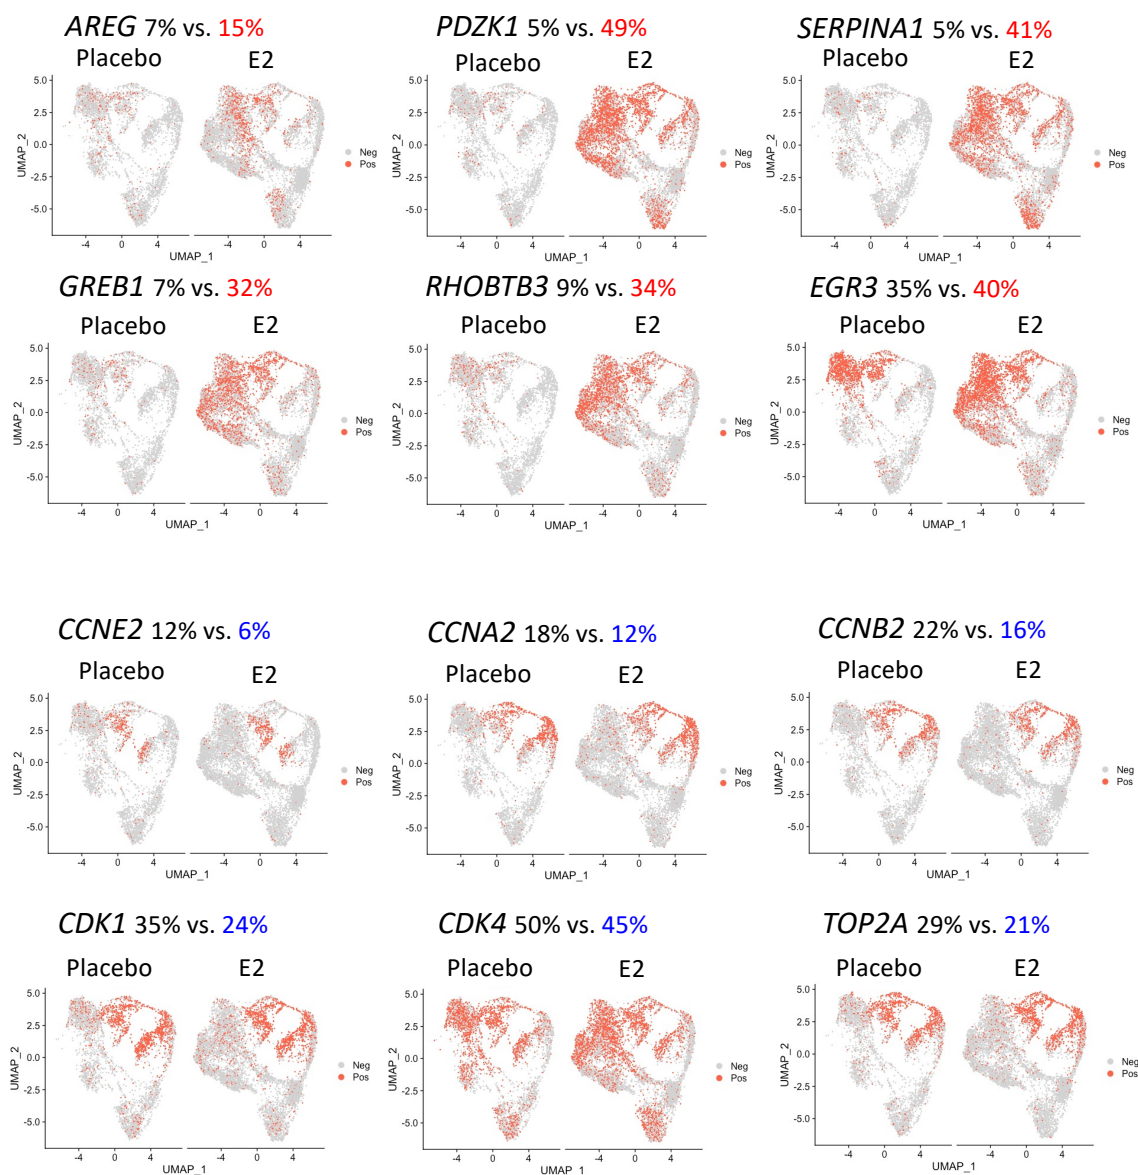

**Figure S7 (2/2)** Gene expression (estrogen-regulated genes and cell cycle proliferation genes) comparison of E2-treated cells versus placebo-treated cells in (a) SC31 and (b) GS3.

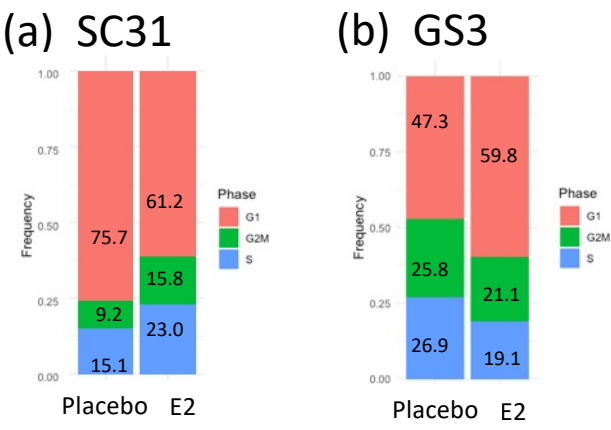

**Figure S8** Distribution of cells in the G1, S, or G2M phases separated by treatments in (a) SC31 and (b) GS3.

(a)

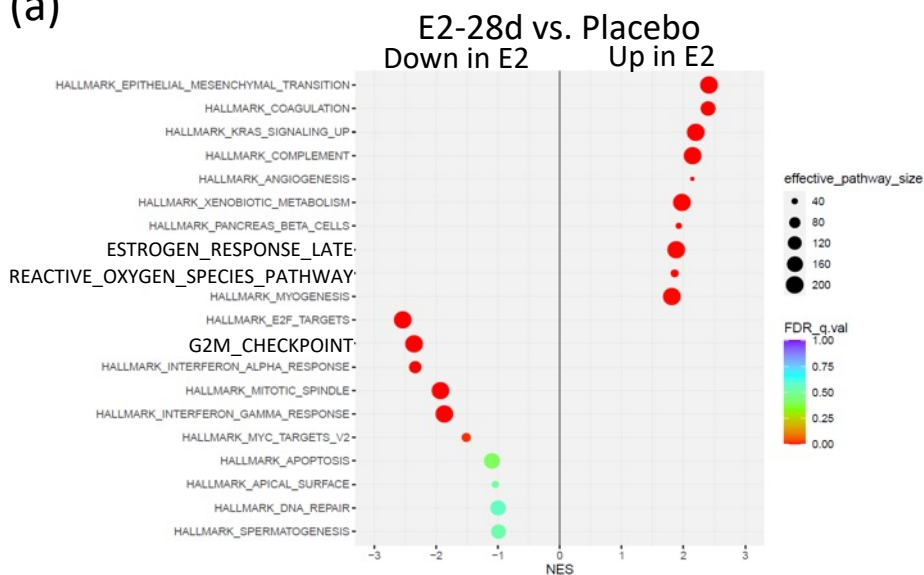

(b)

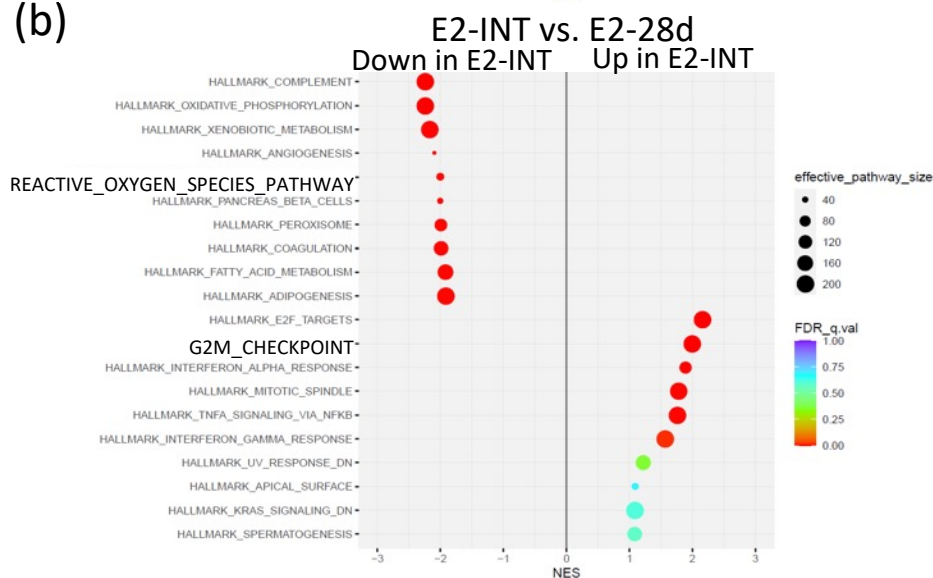

**Figure S9** Analysis of hallmark gene sets based on bulk RNA-Seq data of intermittent E2 sample in GS3: (a) Analysis of hallmark gene sets of 28-day E2 treatment versus placebo; (b) Analysis of hallmark gene sets of intermittent E2 versus 28-day E2 treatment; E2-28d, E2 treatment for 28 days; E2-INT, intermittent E2 treatment.

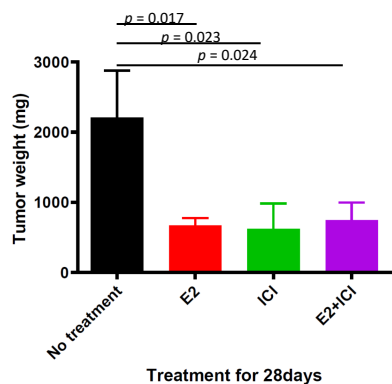

**Figure S10** Tumor weight of GS3 after 4 weeks of placebo/E2/ICI/E2+ICI treatment; Error bars represent SEM and  $p$  value was determined by t-test.

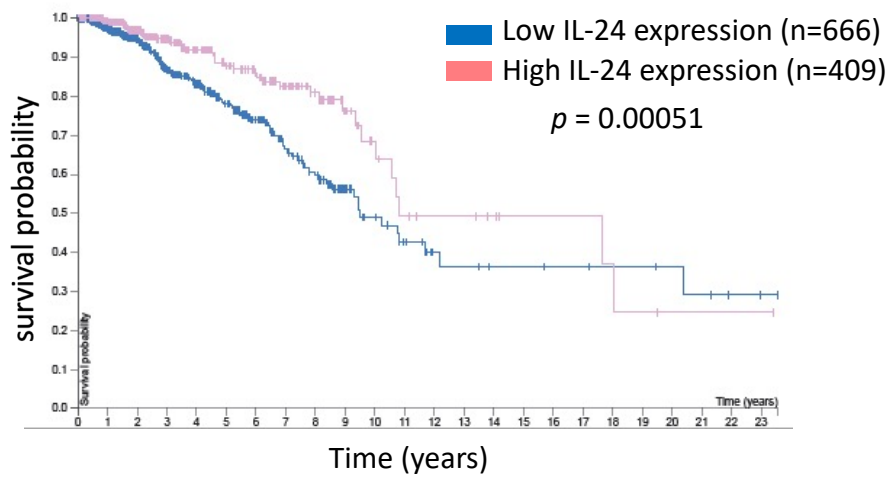

**Figure S11** Prognostic value of IL-24 expression: Kaplan-Meier curves showing estimating overall survival for IL-24 expression according to the human protein atlas (<https://www.proteinatlas.org/ENSG00000162892-IL24/pathology/breast+cancer>, Accessed on 11/18/2021);  $p$  value is for comparison of two groups.

**Table S1** Primer sequences

| Genes   |         | Sequence (5'→3')                | T <sub>m</sub> (°C) | Amplicon Size (bp) |
|---------|---------|---------------------------------|---------------------|--------------------|
| ESR1    | Forward | AAG CTT CGA TGA TGG GCT TA      | 54.0                | 145                |
|         | Reverse | AGG ATC TCT AGC CAG GCA CA      | 57.7                |                    |
| ESR2    | Forward | CCA TGA TCC TGC TCA ATT CC      | 53.5                | 150                |
|         | Reverse | ATT GCT GCT GGG AGG AGA T       | 56.3                |                    |
| PGR     | Forward | CTT AAT CAA CTA GGC GAG AG      | 49.9                | 122                |
|         | Reverse | AAG CTC ATC CAA GAA TAC TG      | 49.6                |                    |
| IL24    | Forward | CTT TGT TCT CAT CGT GTC ACA AC  | 54.3                | 114                |
|         | Reverse | TCC AAC TGT TTG AAT GCT CTC C   | 55.3                |                    |
| GADD45A | Forward | GGT GTA CGA AGC GGC CAA         | 58.3                | 59                 |
|         | Reverse | GCA GGC ACA ACA CCA CGT TA      | 58.4                |                    |
| GREB1   | Forward | CAA AGA ATA ACC TGT TGG CCC TGC | 58.7                | 172                |
|         | Reverse | GAC ATG CCT GCG CTC TCA TAC TTA | 58.8                |                    |
| TFF1    | Forward | GTG TCA CGC CCT CCC AGT         | 60.2                | 63                 |
|         | Reverse | GGA CCC CAC GAA CGG TG          | 58.9                |                    |
| ERBB2   | Forward | AAA GGC CCA AGA CTC TCT CC      | 56.6                | 89                 |
|         | Reverse | CAA GTA CTC GGG GTT CTC CA      | 56.2                |                    |
| ACTB    | Forward | CAA CTG GGA CGA CAT GGA GA      | 56.7                | 170                |
|         | Reverse | ACG TAC ATG GTG GGG TGT TG      | 57.6                |                    |
| GAPDH   | Forward | GGT CTC CTC TGA CTT CAA CA      | 53.8                | 116                |
|         | Reverse | AGC CAA ATT CGT TGT CAT AC      | 50.9                |                    |

**Table S2** Analysis of hallmark gene sets based on bulk RNA-Seq data of different treatment samples in GS3

| Treatment  | Upregulated in E2 (vs. control) | <i>p</i> -value        | Downregulated in E2 (vs. control) | <i>p</i> -value        |
|------------|---------------------------------|------------------------|-----------------------------------|------------------------|
| E2-5 days  | ESTROGEN_RESPONSE_EARLY         | $1.43 \times 10^{-31}$ | P53_PATHWAY                       | $2.93 \times 10^{-06}$ |
|            | ESTROGEN_RESPONSE_LATE          | $2.57 \times 10^{-29}$ | MYOGENESIS                        | $9.75 \times 10^{-05}$ |
|            | TNFA_SIGNALING_VIA_NFKB         | $6.51 \times 10^{-09}$ | KRAS_SIGNALING_DN                 | $4.57 \times 10^{-04}$ |
| E2-10 days | ESTROGEN_RESPONSE_EARLY         | $3.03 \times 10^{-27}$ | G2M_CHECKPOINT                    | $1.21 \times 10^{-24}$ |
|            | ESTROGEN_RESPONSE_LATE          | $4.60 \times 10^{-23}$ | MITOTIC_SPINDLE                   | $3.59 \times 10^{-12}$ |
|            | PANCREAS_BETA_CELLS             | $4.94 \times 10^{-11}$ | E2F_TARGETS                       | $3.87 \times 10^{-11}$ |

Footnote: This table included top three hallmark gene sets.

**Table S3** Human-derived cells and mouse-derived cells in SC31 and GS3

|               | SC31  | GS3    |
|---------------|-------|--------|
| Human-placebo | 3,110 | 3,927  |
| Human-E2      | 2,471 | 6,704  |
| Human         | 5,581 | 10,631 |
| Mouse-placebo | 1,143 | 224    |
| Mouse-E2      | 356   | 905    |
| Mouse         | 1,499 | 1,129  |



**Table S4** The number of cells in each cluster of single-cells in SC31 and GS3

| SC31    | C0    | C1    | C2    | C3    | C4    | C5  | C6  | C7  | Total  |
|---------|-------|-------|-------|-------|-------|-----|-----|-----|--------|
| Placebo | 1,050 | 351   | 263   | 496   | 445   | 157 | 333 | 15  | 3,110  |
| E2      | 1,102 | 364   | 448   | 90    | 112   | 290 | 57  | 8   | 2,471  |
| Total   | 2,152 | 715   | 711   | 586   | 557   | 447 | 390 | 23  | 5,581  |
| GS3     | C0    | C1    | C2    | C3    | C4    | C5  | C6  | C7  | total  |
| Placebo | 1,163 | 409   | 690   | 527   | 277   | 392 | 315 | 154 | 3,927  |
| E2      | 1,427 | 1,847 | 784   | 662   | 809   | 500 | 257 | 418 | 6,704  |
| Total   | 2,590 | 2,256 | 1,474 | 1,189 | 1,086 | 892 | 572 | 572 | 10,631 |

**Table S5** Analysis of GSEA hallmark gene sets based on scRNA-Seq data in each cluster of SC31

| Cluster | Upregulated Gene Set Name | <i>p</i> -value         | Downregulated Gene Set Name | <i>p</i> -value        |
|---------|---------------------------|-------------------------|-----------------------------|------------------------|
| C0      | TNFA_SIGNALING_VIA_NFKB   | $9.08 \times 10^{-45}$  | E2F_TARGETS                 | $2.15 \times 10^{-73}$ |
|         | ESTROGEN_RESPONSE_LATE    | $1.92 \times 10^{-13}$  | G2M_CHECKPOINT              | $7.77 \times 10^{-54}$ |
|         | ESTROGEN_RESPONSE_EARLY   | $4.33 \times 10^{-12}$  | HYPOXIA                     | $4.86 \times 10^{-23}$ |
|         | HYPOXIA                   | $4.33 \times 10^{-12}$  |                             |                        |
| C1      | HYPOXIA                   | $4.24 \times 10^{-62}$  | E2F_TARGETS                 | $2.92 \times 10^{-55}$ |
|         | GLYCOLYSIS                | $2.94 \times 10^{-34}$  | MTORC1_SIGNALING            | $8.01 \times 10^{-42}$ |
|         | MTORC1_SIGNALING          | $1.19 \times 10^{-17}$  | MYC_TARGETS_V1              | $8.01 \times 10^{-42}$ |
| C2      | E2F_TARGETS               | $6.72 \times 10^{-208}$ | P53_PATHWAY                 | $3.55 \times 10^{-14}$ |
|         | G2M_CHECKPOINT            | $1.73 \times 10^{-111}$ | INTERFERON_GAMMA_RESPONSE   | $3.66 \times 10^{-13}$ |
|         | MYC_TARGETS_V1            | $1.38 \times 10^{-79}$  | APOPTOSIS                   | $8.21 \times 10^{-13}$ |
| C3      | INTERFERON_ALPHA_RESPONSE | $2.76 \times 10^{-84}$  | TNFA_SIGNALING_VIA_NFKB     | $1.31 \times 10^{-71}$ |
|         | INTERFERON_GAMMA_RESPONSE | $4.29 \times 10^{-76}$  | E2F_TARGETS                 | $3.41 \times 10^{-51}$ |
|         | COMPLEMENT                | $6.25 \times 10^{-13}$  | HYPOXIA                     | $4.65 \times 10^{-41}$ |
| C4      | G2M_CHECKPOINT            | $2.95 \times 10^{-10}$  | TNFA_SIGNALING_VIA_NFKB     | $2.07 \times 10^{-20}$ |
|         | P53_PATHWAY               | $2.95 \times 10^{-10}$  | ESTROGEN_RESPONSE_LATE      | $3.58 \times 10^{-18}$ |
|         | MITOTIC_SPINDLE           | $2.05 \times 10^{-09}$  | MTORC1_SIGNALING            | $4.39 \times 10^{-17}$ |
| C5      | G2M_CHECKPOINT            | $2.72 \times 10^{-112}$ | INTERFERON_GAMMA_RESPONSE   | $5.42 \times 10^{-29}$ |
|         | E2F_TARGETS               | $7.16 \times 10^{-98}$  | INTERFERON_ALPHA_RESPONSE   | $2.41 \times 10^{-25}$ |
|         | MITOTIC_SPINDLE           | $1.00 \times 10^{-42}$  | HYPOXIA                     | $1.31 \times 10^{-15}$ |
| C6      | MTORC1_SIGNALING          | $3.30 \times 10^{-41}$  | E2F_TARGETS                 | $1.33 \times 10^{-70}$ |
|         | APOPTOSIS                 | $1.40 \times 10^{-25}$  | G2M_CHECKPOINT              | $1.36 \times 10^{-40}$ |
|         | UNFOLDED_PROTEIN_RESPONSE | $3.94 \times 10^{-25}$  | ESTROGEN_RESPONSE_LATE      | $2.35 \times 10^{-39}$ |
| C7      | OXIDATIVE_PHOSPHORYLATION | $8.89 \times 10^{-52}$  | ESTROGEN_RESPONSE_LATE      | $6.09 \times 10^{-28}$ |
|         | ADIPOGENESIS              | $3.81 \times 10^{-11}$  | ESTROGEN_RESPONSE_EARLY     | $6.65 \times 10^{-24}$ |
|         | HEME_METABOLISM           | $3.81 \times 10^{-11}$  | TNFA_SIGNALING_VIA_NFKB     | $3.17 \times 10^{-15}$ |

Footnote: This table included top three hallmark gene sets.

**Table S6** Analysis of GSEA hallmark gene sets based on scRNA-Seq data in each cluster of GS3

| Cluster | Upregulated Gene Set Name       | <i>p</i> -value        | Downregulated Gene Set Name | <i>p</i> -value        |
|---------|---------------------------------|------------------------|-----------------------------|------------------------|
| C0      | TNFA_SIGNALING_VIA_NFKB         | $1.33 \times 10^{-53}$ | MYC_TARGETS_V1              | $7.44 \times 10^{-36}$ |
|         | APOPTOSIS                       | $1.09 \times 10^{-15}$ | E2F_TARGETS                 | $6.13 \times 10^{-29}$ |
|         | HYPOXIA                         | $5.09 \times 10^{-13}$ | G2M_CHECKPOINT              | $2.02 \times 10^{-22}$ |
| C1      | ESTROGEN_RESPONSE_LATE          | $3.90 \times 10^{-07}$ | MYC_TARGETS_V1              | $5.13 \times 10^{-65}$ |
|         | ESTROGEN_RESPONSE_EARLY         | $5.13 \times 10^{-06}$ | E2F_TARGETS                 | $1.19 \times 10^{-37}$ |
|         | PROTEIN_SECRETION               | $1.81 \times 10^{-05}$ | G2M_CHECKPOINT              | $5.62 \times 10^{-25}$ |
| C2      | OXIDATIVE_PHOSPHORYLATION       | $7.48 \times 10^{-33}$ | G2M_CHECKPOINT              | $3.76 \times 10^{-25}$ |
|         | MYC_TARGETS_V1                  | $3.45 \times 10^{-13}$ | E2F_TARGETS                 | $1.03 \times 10^{-23}$ |
|         | ADIPOGENESIS                    | $5.50 \times 10^{-12}$ | TNFA_SIGNALING_VIA_NFKB     | $9.61 \times 10^{-11}$ |
| C3      | MYC_TARGETS_V1                  | $3.52 \times 10^{-66}$ | TNFA_SIGNALING_VIA_NFKB     | $2.12 \times 10^{-35}$ |
|         | G2M_CHECKPOINT                  | $2.76 \times 10^{-59}$ | ESTROGEN_RESPONSE_EARLY     | $4.71 \times 10^{-17}$ |
|         | E2F_TARGETS                     | $2.97 \times 10^{-54}$ | ESTROGEN_RESPONSE_LATE      | $1.40 \times 10^{-14}$ |
| C4      | REACTIVE_OXYGEN_SPECIES_PATHWAY | $2.99 \times 10^{-05}$ | TNFA_SIGNALING_VIA_NFKB     | $6.12 \times 10^{-07}$ |
|         | ESTROGEN_RESPONSE_EARLY         | $1.05 \times 10^{-04}$ | E2F_TARGETS                 | $2.46 \times 10^{-04}$ |
|         | HYPOXIA                         | $1.05 \times 10^{-04}$ | G2M_CHECKPOINT              | $2.46 \times 10^{-04}$ |
| C5      | E2F_TARGETS                     | $9.16 \times 10^{-80}$ | MTORC1_SIGNALING            | $1.62 \times 10^{-08}$ |
|         | G2M_CHECKPOINT                  | $1.77 \times 10^{-48}$ | P53_PATHWAY                 | $1.06 \times 10^{-05}$ |
|         | MYC_TARGETS_V1                  | $1.80 \times 10^{-13}$ | UNFOLDED_PROTEIN_RESPONSE   | $2.21 \times 10^{-05}$ |
| C6      | MYC_TARGETS_V1                  | $2.46 \times 10^{-97}$ | TNFA_SIGNALING_VIA_NFKB     | $8.16 \times 10^{-31}$ |
|         | E2F_TARGETS                     | $3.78 \times 10^{-78}$ | ESTROGEN_RESPONSE_EARLY     | $7.28 \times 10^{-20}$ |
|         | G2M_CHECKPOINT                  | $5.57 \times 10^{-41}$ | APOPTOSIS                   | $4.36 \times 10^{-14}$ |
| C7      | MYC_TARGETS_V1                  | $6.62 \times 10^{-13}$ | OXIDATIVE_PHOSPHORYLATION   | $4.05 \times 10^{-22}$ |
|         | UNFOLDED_PROTEIN_RESPONSE       | $1.89 \times 10^{-11}$ | E2F_TARGETS                 | $8.10 \times 10^{-21}$ |
|         | P53_PATHWAY                     | $1.30 \times 10^{-09}$ | ESTROGEN_RESPONSE_LATE      | $4.71 \times 10^{-17}$ |

Footnote: This table included top three hallmark gene sets.

**Table S7** The percentage of *ESR1*<sup>+</sup> and *ESR1*<sup>-</sup> cells in two tumors treated with placebo or E2

|             | <i>ESR1</i> <sup>+</sup> cells |     | <i>ESR1</i> <sup>-</sup> cells |     |
|-------------|--------------------------------|-----|--------------------------------|-----|
|             | Placebo                        | E2  | Placebo                        | E2  |
| <b>SC31</b> | 33%                            | 64% | 67%                            | 36% |
| <b>GS3</b>  | 41%                            | 31% | 59%                            | 69% |

**Table S8** Reported E2 therapies for AI resistant ER<sup>+</sup> breast cancer

| Reference             | Treatments                                                                                  | Objective Response Rate<br>(CR+PR) (%) | Clinical Benefit Rate<br>(CR+PR+SD) (%) |
|-----------------------|---------------------------------------------------------------------------------------------|----------------------------------------|-----------------------------------------|
| Lønning et al, 2001   | DES: 5 mg, three times a day                                                                | 10/32 (31)                             | 12/32 (38)                              |
| Agrawal et al, 2006   | EE: 1 mg                                                                                    | 3/12 (25)                              | 4/12 (33%)                              |
| Ellis et al, 2009     | E2: 6 mg vs. 30 mg                                                                          | 6 mg, 3/34 (9)<br>30 mg,1/32 (3)       | 6 mg, 10/34 (29)<br>30 mg, 9/32 (28)    |
| Mahtani et al, 2009   | DES: 5 mg, three times a day<br>E2: 10 mg, three times a day<br>E2: 2 mg, three times a day | 5/20 (25)                              | 9/20 (45)                               |
| Iwase et al, 2013     | EE: 3 mg                                                                                    | 9/18 (50)                              | 10/18 (56)                              |
| Chalasani et al, 2014 | E2: 6 mg                                                                                    | 3/13 (23)                              | 6/13 (46)                               |
| Zucchini et al, 2015  | E2V: 2 mg/day                                                                               | 0/19 (0)                               | 5/19 (26)                               |

DES, Diethylstilbestrol; EE, Ethinyl estradiol; E2, Estradiol; CR, complete response; PR, partial response; SD, stable disease
